# Supplementary material
Source: PubMed Central journal article supplement (PMC11660104)
Supplement: sj-pdf-1-apm-10.1177_01466216241310602.pdf [file sj-pdf-1-apm-10.1177_01466216241310602.pdf]

# Supplementary Material

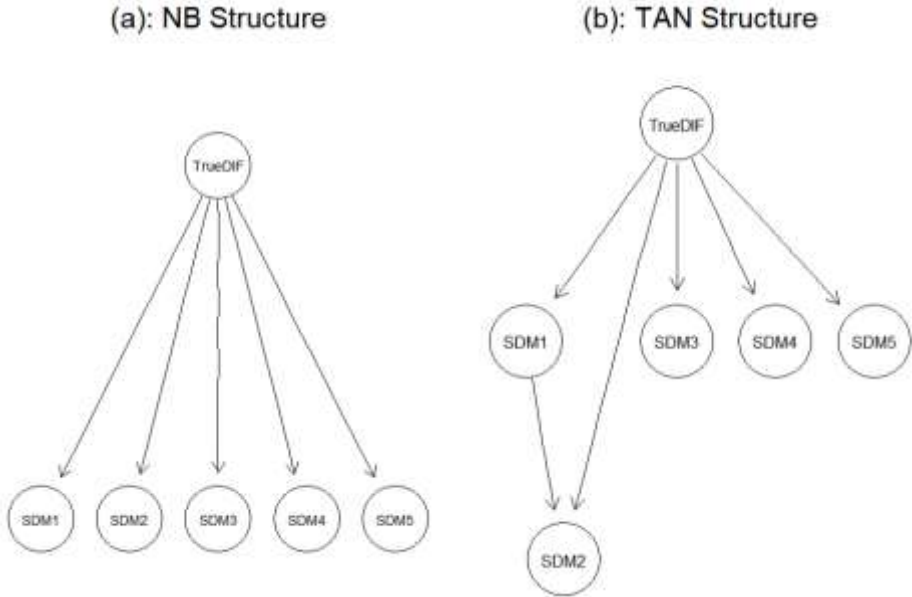

Figure S1 Examples of the NB and TAN structures

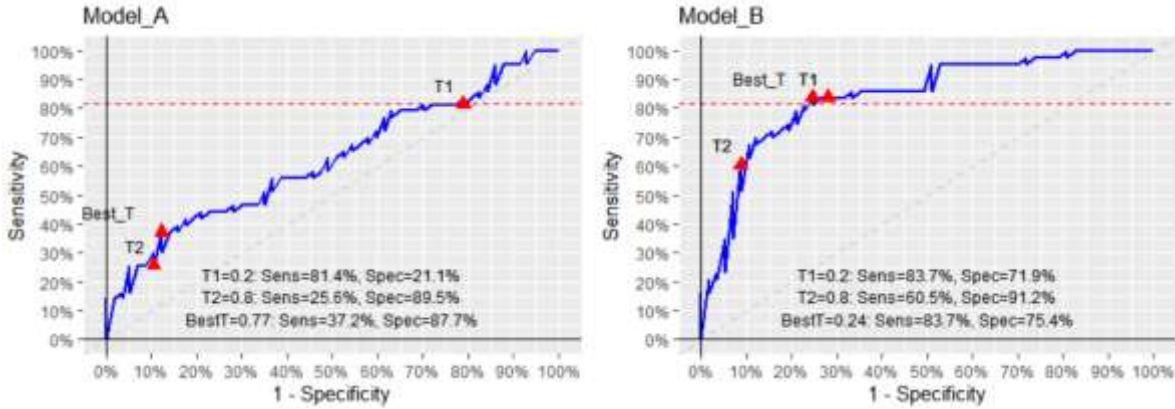

Figure S2 Example Plot of Area Under the Curve (AUC)

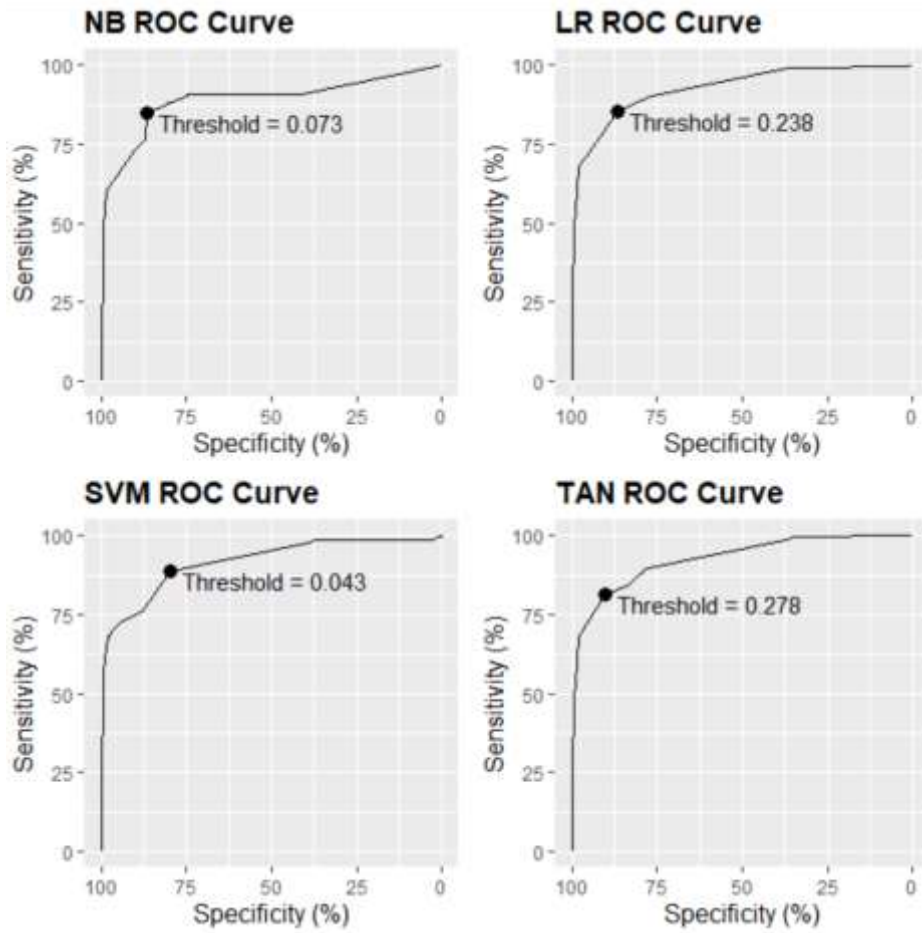

**Figure S3** AUC and Threshold Settings of Four MDC Models

**Table S1** Test Conditions for Simulated Data

| Type of Test Conditions                            | Test Conditions   | Level Count | Training Set (TS)&      |                            |
|----------------------------------------------------|-------------------|-------------|-------------------------|----------------------------|
|                                                    |                   |             | Matched Test Sets (MTS) | Unmatched Test Sets (UMTS) |
| Observable Test Conditions<br>(Total: 3*2*3=18)    | Sample Size       | 3           | 500,1000,2000           | Same as left               |
|                                                    | Sample Size Ratio | 2           | R=50%                   | Same as left               |
|                                                    |                   |             | R=80%                   | Same as left               |
| DIF-Related Test<br>Conditions<br>(Total: 2*2*2=8) | Test Length       | 3           | 20,40,60                | Same as left               |
|                                                    | $\Delta$ alpha    | 2           | DIFmagnitudes_a         | 0,-1                       |
|                                                    |                   |             | DIFmagnitudes_b         | 0.4,0.8                    |
|                                                    | Proportion of DIF | 2           | 0.2,0.3                 | 0.1,0.4                    |
| Other Unobservable Test                            | Impact            | 2           | No Impact               | Significant Impact:        |

---

Conditions

R: N (0,1);

R: N (0,1);

(Total:2)

F: N (0,1)

F: N (-1,1)

Impact

Reverse Impact:

R: N (0,1);

R: N (-0.5,1);

F: N (-0.5,1)

F: N (0,1)

aR: N(1,0.2)

aR:U(0.9,2.5)

Item parameters

-

aF=aR+Δa(DIF item)

aF=aR+Δa(DIF item)

alpha

aF=aR(noDIF item)

aF=aR(noDIF item)

bR: N(0,1)

bR:U(-1.9,1.9)

Item parameters

-

bF=bR+Δb(DIF item)

bF=bR+Δb(DIF item)

beta

bF=bR(noDIF item)

bF=bR(noDIF item)

---

**Table S2** AUC (%) for MTS Under Each Test Condition

| Test Conditions  | Level      | Multi-Detectors Combination (MDC) |      |      |      |      | Single Detection Methods (SDM) |          |      |      | Simple Integration Methods (SIM) |         |
|------------------|------------|-----------------------------------|------|------|------|------|--------------------------------|----------|------|------|----------------------------------|---------|
|                  |            | LR                                | NB   | SVM  | TAN  | M.H  | Stand.                         | Logistic | Lord | Raju | Voting                           | AnyFlat |
| Samplesize       | 500        | 78.5                              | 77.8 | 78.1 | 78.7 | 72.1 | 71.3                           | 77.3     | 58.9 | 64.1 | 70.5                             | 62.0    |
|                  | 1000       | 82.3                              | 81.5 | 81.2 | 82.0 | 77.9 | 73.0                           | 80.5     | 63.3 | 68.2 | 74.6                             | 65.1    |
|                  | 2000       | 83.3                              | 82.4 | 80.0 | 82.8 | 79.8 | 72.7                           | 79.1     | 67.4 | 69.8 | 76.3                             | 65.7    |
| SamplesizeRaito  | 0.5        | 82.2                              | 81.2 | 80.1 | 81.7 | 77.7 | 72.6                           | 79.2     | 65.0 | 68.6 | 74.6                             | 65.9    |
|                  | 0.8        | 80.5                              | 80.0 | 79.5 | 80.6 | 75.4 | 72.0                           | 78.8     | 61.4 | 66.1 | 72.9                             | 62.7    |
| TestLength       | 20         | 81.0                              | 80.5 | 79.3 | 80.9 | 76.3 | 72.3                           | 79.2     | 64.4 | 68.8 | 74.1                             | 64.9    |
|                  | 40         | 81.4                              | 80.7 | 80.4 | 81.2 | 76.7 | 72.5                           | 78.9     | 62.9 | 67.5 | 73.7                             | 64.0    |
|                  | 60         | 81.7                              | 80.6 | 79.6 | 81.5 | 76.9 | 72.2                           | 78.8     | 62.2 | 65.6 | 73.6                             | 63.9    |
| ProportionsofDIF | 0.2        | 84.2                              | 83.6 | 81.7 | 83.9 | 79.4 | 73.6                           | 82.8     | 66.2 | 69.0 | 77.2                             | 67.2    |
|                  | 0.3        | 78.5                              | 77.6 | 77.8 | 78.4 | 73.8 | 71.0                           | 75.2     | 60.1 | 65.7 | 70.3                             | 61.3    |
| DIFmagnitudes_a  | 0          | 73.1                              | 73.0 | 68.1 | 72.8 | 72.8 | 63.6                           | 72.2     | 66.9 | 64.2 | 70.0                             | 69.8    |
|                  | 1          | 89.6                              | 88.2 | 91.5 | 89.5 | 80.4 | 81.1                           | 85.8     | 59.5 | 70.5 | 77.6                             | 58.8    |
| DIFmagnitudes_b  | 0.4        | 77.4                              | 76.6 | 74.7 | 77.1 | 73.3 | 67.4                           | 75.3     | 60.6 | 65.1 | 70.2                             | 62.4    |
|                  | 0.8        | 85.3                              | 84.5 | 84.8 | 85.3 | 79.9 | 77.3                           | 82.6     | 65.8 | 69.6 | 77.3                             | 66.2    |
| Impact           | R 0 F -0.5 | 80.7                              | 80.0 | 79.4 | 80.7 | 76.1 | 71.8                           | 78.2     | 62.4 | 66.2 | 72.9                             | 63.6    |
|                  | R 0 F 0    | 82.0                              | 81.2 | 80.1 | 81.7 | 77.1 | 72.8                           | 79.7     | 63.9 | 68.5 | 74.7                             | 64.9    |

Note: The shaded colors in the table indicate the best results from SDM and SIM under the current test conditions.

**Table S3** Results of Repeated Measures ANOVA Analysis of AUC for MTS

| Effect                  | SSn      | SSd      | DFn | DFd    | F     | p     | $\eta^2$ |
|-------------------------|----------|----------|-----|--------|-------|-------|----------|
| Method                  | 13538716 | 41422067 | 10  | 316690 | 10351 | 0.000 | 0.327    |
| Method:DIFmagnitudes_a  | 8129019  | 41422067 | 10  | 316690 | 6215  | 0.000 | 0.196    |
| DIFmagnitudes_a         | 7357765  | 41422067 | 1   | 316690 | 56253 | 0.000 | 0.178    |
| DIFmagnitudes_b         | 4019250  | 41422067 | 1   | 316690 | 30729 | 0.000 | 0.097    |
| ProportionsofDIF        | 2275684  | 41422067 | 1   | 316690 | 17399 | 0.000 | 0.055    |
| Samplesize              | 1223780  | 41422067 | 2   | 316690 | 4678  | 0.000 | 0.030    |
| Method:Samplesize       | 278871   | 41422067 | 20  | 316690 | 107   | 0.000 | 0.007    |
| Method:DIFmagnitudes_b  | 292542   | 41422067 | 10  | 316690 | 224   | 0.000 | 0.007    |
| SamplesizeRaito         | 237334   | 41422067 | 1   | 316690 | 1815  | 0.000 | 0.006    |
| Method:ProportionsofDIF | 162344   | 41422067 | 10  | 316690 | 124   | 0.000 | 0.004    |
| Impact                  | 137481   | 41422067 | 1   | 316690 | 1051  | 0.000 | 0.003    |
| Method:SamplesizeRaito  | 81307    | 41422067 | 10  | 316690 | 62    | 0.000 | 0.002    |
| Method:TestLength       | 82533    | 41422067 | 20  | 316690 | 32    | 0.000 | 0.002    |
| TestLength              | 11547    | 41422067 | 2   | 316690 | 44    | 0.000 | 0.000    |
| Method:Impact           | 14269    | 41422067 | 10  | 316690 | 11    | 0.000 | 0.000    |

**Table S4** AUC (%) for UMTS Under Each Test Condition

| Test Conditions  | Level      | Multi-Detectors Combination (MDC) |      |      |      | Single Detection Methods (SDM) |        |          |      |      | Simple Integration Methods (SIM) |         |
|------------------|------------|-----------------------------------|------|------|------|--------------------------------|--------|----------|------|------|----------------------------------|---------|
|                  |            | LR                                | NB   | SVM  | TAN  | M.H                            | Stand. | Logistic | Lord | Raju | Voting                           | AnyFlat |
| Samplesize       | 500        | 77.1                              | 76.8 | 76.5 | 77.3 | 71.8                           | 70.0   | 76.5     | 63.0 | 62.7 | 70.7                             | 65.0    |
|                  | 1000       | 80.6                              | 80.4 | 78.8 | 80.7 | 77.0                           | 71.3   | 79.8     | 68.4 | 67.3 | 75.3                             | 68.2    |
|                  | 2000       | 81.5                              | 81.1 | 77.5 | 81.4 | 78.6                           | 71.7   | 78.5     | 72.0 | 69.7 | 77.6                             | 68.2    |
| SamplesizeRaito  | 0.5        | 80.2                              | 79.8 | 77.0 | 80.0 | 76.9                           | 71.3   | 78.3     | 69.5 | 68.4 | 75.8                             | 68.5    |
|                  | 0.8        | 79.4                              | 79.1 | 78.1 | 79.6 | 74.8                           | 70.7   | 78.2     | 66.1 | 64.7 | 73.3                             | 65.8    |
| TestLength       | 20         | 79.4                              | 79.2 | 76.9 | 79.3 | 75.4                           | 70.8   | 78.0     | 69.0 | 67.9 | 74.4                             | 68.0    |
|                  | 40         | 79.9                              | 79.7 | 78.6 | 80.0 | 76.1                           | 71.3   | 78.5     | 67.7 | 66.8 | 74.7                             | 67.1    |
|                  | 60         | 80.0                              | 79.5 | 77.1 | 80.1 | 76.0                           | 71.0   | 78.3     | 66.6 | 65.0 | 74.4                             | 66.3    |
| ProportionsofDIF | 0.1        | 85.6                              | 85.6 | 81.4 | 85.7 | 81.5                           | 73.7   | 85.2     | 74.5 | 71.7 | 81.1                             | 74.1    |
|                  | 0.4        | 73.9                              | 73.3 | 73.8 | 73.9 | 70.1                           | 68.3   | 71.2     | 61.1 | 61.5 | 67.9                             | 60.2    |
| DIFmagnitudes_a  | 0          | 73.3                              | 73.5 | 68.9 | 73.3 | 73.2                           | 64.7   | 72.2     | 68.7 | 66.0 | 70.9                             | 69.9    |
|                  | 1          | 86.2                              | 85.3 | 86.2 | 86.3 | 78.4                           | 77.2   | 84.2     | 66.9 | 67.2 | 78.1                             | 64.4    |
| DIFmagnitudes_b  | 0.4        | 76.9                              | 76.9 | 72.8 | 77.0 | 73.6                           | 66.1   | 76.0     | 66.4 | 65.3 | 72.4                             | 66.5    |
|                  | 0.8        | 82.6                              | 82.0 | 82.4 | 82.6 | 78.1                           | 76.0   | 80.5     | 69.2 | 67.8 | 76.6                             | 67.7    |
| Impact           | R -0.5 F 0 | 79.8                              | 79.5 | 78.3 | 79.9 | 75.9                           | 72.4   | 78.9     | 68.7 | 67.4 | 75.3                             | 68.0    |
|                  | R 0 F -1   | 79.7                              | 79.4 | 76.9 | 79.7 | 75.8                           | 69.6   | 77.6     | 66.8 | 65.7 | 73.8                             | 66.2    |

**Note:** The shaded colors in the table indicate the best results from SDM and SIM under the current test conditions.

**Table S5** Results of Repeated Measures ANOVA Analysis of AUC for UMTS

| Effect                  | SSn      | SSd      | DFn | DFd    | F     | p     | $\eta^2$ |
|-------------------------|----------|----------|-----|--------|-------|-------|----------|
| ProportionsofDIF        | 10228764 | 50770975 | 1   | 316690 | 63803 | 0.000 | 0.201    |
| Method                  | 8064966  | 50770975 | 10  | 316690 | 5031  | 0.000 | 0.159    |
| DIFmagnitudes_a         | 4878220  | 50770975 | 1   | 316690 | 30428 | 0.000 | 0.096    |
| Method:DIFmagnitudes_a  | 3707935  | 50770975 | 10  | 316690 | 2313  | 0.000 | 0.073    |
| DIFmagnitudes_b         | 2006143  | 50770975 | 1   | 316690 | 12514 | 0.000 | 0.040    |
| Samplesize              | 1262096  | 50770975 | 2   | 316690 | 3936  | 0.000 | 0.025    |
| Method:ProportionsofDIF | 530273   | 50770975 | 10  | 316690 | 331   | 0.000 | 0.010    |
| Method:DIFmagnitudes_b  | 520387   | 50770975 | 10  | 316690 | 325   | 0.000 | 0.010    |
| Method:Samplesize       | 328750   | 50770975 | 20  | 316690 | 103   | 0.000 | 0.006    |
| SamplesizeRaito         | 167325   | 50770975 | 1   | 316690 | 1044  | 0.000 | 0.003    |
| Method:SamplesizeRaito  | 168713   | 50770975 | 10  | 316690 | 105   | 0.000 | 0.003    |
| Impact                  | 116194   | 50770975 | 1   | 316690 | 725   | 0.000 | 0.002    |
| Method:TestLength       | 96956    | 50770975 | 20  | 316690 | 30    | 0.000 | 0.002    |
| Method:Impact           | 61431    | 50770975 | 10  | 316690 | 38    | 0.000 | 0.001    |
| TestLength              | 17937    | 50770975 | 2   | 316690 | 56    | 0.000 | 0.000    |



**Table S6** Correlations Between Various Results of SDMs and MDC (LR) (MTS)

| TestConditions   | Level     | M.H   | Stand. | Logistic | Lord  | Raju   | Voting | AnyFlat |
|------------------|-----------|-------|--------|----------|-------|--------|--------|---------|
| Samplesize       | 500       | 0.742 | 0.700  | 0.859    | 0.280 | -0.047 | 0.663  | 0.499   |
| Samplesize       | 1000      | 0.849 | 0.598  | 0.817    | 0.358 | 0.005  | 0.645  | 0.497   |
| Samplesize       | 2000      | 0.870 | 0.454  | 0.781    | 0.455 | 0.116  | 0.661  | 0.486   |
| SamplesizeRaito  | 0.5       | 0.841 | 0.560  | 0.789    | 0.406 | 0.068  | 0.632  | 0.528   |
| SamplesizeRaito  | 0.8       | 0.799 | 0.609  | 0.849    | 0.322 | -0.019 | 0.681  | 0.460   |
| TestLength       | 20        | 0.802 | 0.591  | 0.851    | 0.390 | 0.022  | 0.672  | 0.494   |
| TestLength       | 40        | 0.829 | 0.576  | 0.807    | 0.352 | 0.015  | 0.647  | 0.491   |
| TestLength       | 60        | 0.829 | 0.588  | 0.798    | 0.350 | 0.037  | 0.650  | 0.497   |
| ProportionsofDIF | 0.2       | 0.821 | 0.602  | 0.833    | 0.384 | 0.047  | 0.676  | 0.496   |
| ProportionsofDIF | 0.3       | 0.819 | 0.568  | 0.805    | 0.344 | 0.001  | 0.636  | 0.492   |
| DIFmagnitudes_a  | 0         | 0.833 | 0.507  | 0.856    | 0.585 | 0.409  | 0.703  | 0.712   |
| DIFmagnitudes_a  | 1         | 0.808 | 0.661  | 0.781    | 0.144 | -0.359 | 0.609  | 0.273   |
| DIFmagnitudes_b  | 0.4       | 0.804 | 0.543  | 0.808    | 0.349 | 0.006  | 0.629  | 0.487   |
| DIFmagnitudes_b  | 0.8       | 0.836 | 0.626  | 0.829    | 0.380 | 0.042  | 0.684  | 0.501   |
| Impact           | R:0F:-0.5 | 0.820 | 0.578  | 0.817    | 0.346 | 0.014  | 0.650  | 0.484   |
| Impact           | R:0F:0    | 0.820 | 0.592  | 0.821    | 0.383 | 0.034  | 0.663  | 0.504   |

**Table S7** Correlations Between Various Results of SDMs and MDC (LR) (UMTS)

| TestConditions   | Level     | M.H   | Stand. | Logistic | Lord  | Raju  | Voting | AnyFlat |
|------------------|-----------|-------|--------|----------|-------|-------|--------|---------|
| Samplesize       | 500       | 0.724 | 0.638  | 0.851    | 0.448 | 0.202 | 0.653  | 0.609   |
| Samplesize       | 1000      | 0.821 | 0.510  | 0.811    | 0.483 | 0.230 | 0.631  | 0.595   |
| Samplesize       | 2000      | 0.845 | 0.428  | 0.738    | 0.562 | 0.317 | 0.646  | 0.552   |
| SamplesizeRaito  | 0.5       | 0.813 | 0.520  | 0.748    | 0.520 | 0.280 | 0.613  | 0.584   |
| SamplesizeRaito  | 0.8       | 0.781 | 0.531  | 0.852    | 0.476 | 0.219 | 0.673  | 0.587   |
| TestLength       | 20        | 0.756 | 0.518  | 0.824    | 0.528 | 0.256 | 0.628  | 0.612   |
| TestLength       | 40        | 0.811 | 0.529  | 0.782    | 0.493 | 0.245 | 0.636  | 0.584   |
| TestLength       | 60        | 0.823 | 0.530  | 0.794    | 0.473 | 0.248 | 0.666  | 0.560   |
| ProportionsofDIF | 0.1       | 0.790 | 0.566  | 0.811    | 0.525 | 0.315 | 0.666  | 0.600   |
| ProportionsofDIF | 0.4       | 0.803 | 0.485  | 0.789    | 0.471 | 0.184 | 0.620  | 0.570   |
| DIFmagnitudes_a  | 0         | 0.800 | 0.463  | 0.818    | 0.602 | 0.432 | 0.666  | 0.704   |
| DIFmagnitudes_a  | 1         | 0.793 | 0.588  | 0.782    | 0.393 | 0.067 | 0.620  | 0.466   |
| DIFmagnitudes_b  | 0.4       | 0.782 | 0.497  | 0.801    | 0.503 | 0.262 | 0.638  | 0.603   |
| DIFmagnitudes_b  | 0.8       | 0.811 | 0.554  | 0.799    | 0.493 | 0.237 | 0.648  | 0.567   |
| Impact           | R:-0.5F:0 | 0.824 | 0.562  | 0.830    | 0.552 | 0.321 | 0.685  | 0.622   |
| Impact           | R:0F:-1   | 0.770 | 0.489  | 0.770    | 0.444 | 0.178 | 0.601  | 0.549   |

**Table S8** Performance of Models on Real Data

| Performance     | MDC  |      |      |      | SDM  |      |          |      |      |
|-----------------|------|------|------|------|------|------|----------|------|------|
|                 | NB   | LR   | SVM  | TAN  | M.H  | Std  | Logistic | Lord | Raju |
| AUC(%)          | 85.5 | 85.1 | 83.7 | 84.2 | 80.3 | 74.9 | 84.1     | 65.0 | 55.2 |
| Specificity (%) | 84.0 | 84.6 | 88.3 | 78.8 | 77.8 | 50.5 | 89.2     | 81.4 | 58.0 |
| Sensitivity (%) | 87.1 | 85.6 | 79.1 | 89.6 | 82.8 | 99.4 | 78.9     | 48.6 | 52.3 |
